# Supplementary material
Source: publisher figshare collection journal article supplement (https://tandf.figshare.com/ndownloader/files/30926977)
Supplement: Supplementary file 1 [file 30926977]

**Appendix to Diagonal Discriminant Analysis with  
Feature Selection for High Dimensional Data** published  
in the Journal of Computational and Graphical Statistics,  
by Sarah E. Romanes, John T. Ormerod, and Jean Y.H. Yang.

## A Proofs

### Proof: Selection of penalty from $M$ fixed probabilities

We are interested in showing there exists an explicit solution for the following set of equations, with the constraint that  $\sum_{m=1}^M \rho_m = 1$  and  $\rho_m \in (0, 1]$  for all  $m$ .

$$\begin{aligned} 2 \log(\rho_1) - 2 \log(\rho_1) &= C\nu_1 \\ 2 \log(\rho_2) - 2 \log(\rho_1) &= C\nu_2 \\ &\vdots \\ 2 \log(\rho_M) - 2 \log(\rho_1) &= C\nu_M. \end{aligned}$$

With  $\nu_m$  representing the number of degrees of freedom for partition  $m$  (with  $\nu_1 = 0$  (by definition), and  $\nu_2 \leq \nu_3 \leq \dots \leq \nu_M$ ), and with  $C$  representing any real number - in this case, corresponds to the penalty of choice (ie, for the AIC penalty,  $C = -2$ ).

Now, it is clear that the first case holds no matter the choice of  $\rho_1$ , since we are left with a 0 on both the LHS and RHS. Rearranging the rest of the equations in terms of  $\rho_1$ , we are left with the following:

$$\rho_m = \rho_1 e^{C\nu_m} \quad \text{for } m = 2, \dots, M.$$

Since  $\sum_{m=1}^M \rho_m = 1$ , we have explicit solutions for all  $\rho_v$ :

$$\begin{aligned} \rho_1 + \rho_2 + \dots + \rho_M &= 1 \\ \rho_1 + \rho_1 e^{C\nu_2} + \dots + \rho_1 e^{C\nu_M} &= 1 \\ \rho_1 (1 + e^{C\nu_2} + \dots + e^{C\nu_M}) &= 1 \\ \rho_1 \sum_{v=1}^M e^{C\nu_v} &= 1 \end{aligned}$$

so that

$$\rho_1 = \frac{1}{\sum_{m=1}^M e^{C\nu_m}}$$

Substituting this back into the expressions for  $\rho_m, m > 1$ , we have:

$$\rho_m = \frac{e^{C\nu_m}}{\sum_{\ell=1}^M e^{C\nu_\ell}}$$

which is guaranteed to be in  $(0, 1)$  since  $\nu_1 < \nu_2 \leq \nu_3 \leq \dots \leq \nu_M$ .

**Proof of  $\tilde{E} = o_p(1)$**

Let  $X_{ij} \sim p_{jm_j}(\cdot; \theta_{0jm})$  for some true parameter vector  $\theta_{0jm} \in \mathbb{R}^{d_m}$ . Define the log-likelihood for variable  $j$  and hypothesis  $m$  as  $\ell_{jm}(\theta) = \sum_{i=1}^n \ln p_{jm}(X_{ij}; \theta_{jm})$  with corresponding MLE and “pseudo-true” value of  $\theta_{jm}$  as

$$\hat{\theta}_{jm} = \arg \max_{\theta_{jm}} \{\ell_{jm}(\theta_{jm})\} \quad \text{and} \quad \theta_{jm}^* = \arg \max_{\theta_{jm}} \{\mathbb{E}(n^{-1}\ell_{jm}(\theta_{jm}))\},$$

respectively. We will assume conditions on the likelihood and parameter space such that  $\mathbb{E}[n^{-1}\ell_{jm}(\theta_{jm}^*)] \rightarrow \ell_{jm}^*$  for  $1 \leq j \leq p, 1 \leq m \leq M$ . Using the theory summarised in Ormerod et al. (2017) based on Vuong (1989) and van der Vaart (1998) we have two main cases to consider.

- **[Underfitting case]** – Suppose  $\ell_{jm_j}^* > \ell_{jm}^*$  for some  $m \neq m_j$ . Then

$$\frac{1}{2n} [\lambda_{jm_j}(\mathbf{X}_j) - \lambda_{jm}(\mathbf{X}_j)] \xrightarrow{P} \ell_{jm_j}^* - \ell_{jm}^* = \Delta_{jm} > 0$$

and so  $(1/2)\lambda_{jm}(\mathbf{X}_j) = n[\Delta_{jm} + o_p(1)]$ .

- **[Overfitting case]** – Suppose  $\ell_{jm}^* = \ell_{jm_j}^*$  for some  $m \neq m_j$  and let  $\nu_m = d_m - d_{m_j}$ . Then  $\lambda_{jm}(\mathbf{X}_j) - \lambda_{jm_j}(\mathbf{X}_j) \xrightarrow{D} \chi_{\nu_{jm}}^2$ .

The following lemma will be useful.

**Lemma 1 (Gasull et al., 2015):** If  $X_j, j = 1, \dots, p$ , are independent  $\chi_\nu^2$  random variables, and  $M_p = \max_{1 \leq j \leq p} \{X_j\}$ , then  $\frac{1}{2}M_p - [\ln(p) + (\nu/2 - 1) \ln \ln(p) - \ln \Gamma(\nu/2)] \xrightarrow{D} G$ , as  $p \rightarrow \infty$  where  $G$  is a Gumbel distributed random variable.

Define  $\mathcal{J}_m = \{j: \gamma_{0jm} = 1\}$  and  $\mathcal{T}_m = \{j: \ell_{jm}^* = \ell_{jm_j}^*\}$ . Here  $\mathcal{J}_k$  is the set of true variables over the  $k$ th set of hypotheses, and  $\mathcal{T}_m$  is the union of over-fitting and true models over the  $k$ th set of hypotheses. We define and decompose the error as

$$\begin{aligned}
E &= \sum_{j=1}^p 1 - \hat{\gamma}_{jm_j}(\mathbf{X}_j) + \sum_{j=1}^p \sum_{m \neq m_j} \hat{\gamma}_{jm}(\mathbf{X}_j) \\
&= 2 \sum_{j=1}^p \sum_{m \neq m_j} \hat{\gamma}_{jm}(\mathbf{X}_j) = 2 \sum_{m=1}^M \sum_{j \notin \mathcal{J}_m} \hat{\gamma}_{jm}(\mathbf{X}_j) \\
&= \underbrace{2 \sum_{m=2}^M \sum_{j \in \mathcal{O}_m} \hat{\gamma}_{jm}(\mathbf{X}_j)}_{\text{Overfitting models}} + \underbrace{2 \sum_{m=1}^M \sum_{j \in \mathcal{U}_m} \hat{\gamma}_{jm}(\mathbf{X}_j)}_{\text{Underfitting models}} \\
&\triangleq E_{\mathcal{O}} + E_{\mathcal{U}},
\end{aligned}$$

where  $\mathcal{O}_m = \mathcal{J}_m^c \cap \mathcal{T}_m$ , and  $\mathcal{U}_m = \mathcal{J}_m^c \cap \mathcal{T}_m^c$ .

Note that for  $E_{\mathcal{O}}$  the index  $m$  is summation does not include  $m = 1$  since the null model cannot be an overfitting model. Next, we consider  $E_{\mathcal{O}}$  where the true model is used as the null hypothesis and rewrite  $E_{\mathcal{O}}$  as

$$E_{\mathcal{O}} = 2 \sum_{m=2}^M \sum_{j \in \mathcal{O}_m} \frac{\exp \left[ \frac{1}{2} \tilde{\lambda}_{jm}(\mathbf{X}_j) - \tilde{\nu}_m \{ \ln(n) + 2 \ln(p) \} \right]}{\sum_{\ell=1}^M \exp \left[ \frac{1}{2} \tilde{\lambda}_{j\ell}(\mathbf{X}_j) - \tilde{\nu}_{\ell} \{ \ln(n) + 2 \ln(p) \} \right]}$$

where  $\tilde{\lambda}_{jm}(\mathbf{X}_j) = \lambda_{jm}(\mathbf{X}_j) - \lambda_{jm_j}(\mathbf{X}_j)$ . Using a chi-square approximation over the set of overfitting models in place of LRT statistics with  $U_{jm} \stackrel{\text{iid}}{\sim} \chi_{\tilde{\nu}_m}^2$  we obtain an approximation  $\tilde{E}_{\mathcal{O}}$  of  $E_{\mathcal{O}}$  given by

$$\begin{aligned}
\tilde{E}_{\mathcal{O}} &= 2 \sum_{m=1}^M \sum_{j \in \mathcal{J}_m^c \cap \mathcal{T}_m} \frac{\exp \left[ \frac{1}{2} U_{jm} - \tilde{\nu}_m \{ \ln(n) + 2 \ln(p) \} \right]}{\sum_{\ell=1}^M \exp \left[ \frac{1}{2} \lambda_{j\ell}(\mathbf{X}_j) - \tilde{\nu}_{\ell} \{ \ln(n) + 2 \ln(p) \} \right]} \\
&\leq 2 \sum_{m=1}^M \sum_{j \in \mathcal{O}_m} \exp \left[ \frac{1}{2} U_{jm} - \tilde{\nu}_m \{ \ln(n) + 2 \ln(p) \} \right] \\
&\leq 2 \sum_{m=1}^M p_{1m} \exp \left[ \max_{j \in \mathcal{O}_m} \frac{1}{2} Z_{jm} - \tilde{\nu}_m \{ \ln(n) + 2 \ln(p) \} \right] \\
&\rightarrow \sum_{m=1}^M \left( \frac{p_{1m}^2}{p^{2\tilde{\nu}_m} \ln(p_{1m})} \right) \left( \frac{\ln(p_{1m})^{1/2}}{n} \right)^{\tilde{\nu}_m} \frac{2 \exp(G_m)}{\Gamma(\tilde{\nu}_m/2)}
\end{aligned}$$

where  $p_{1k} = |\mathcal{O}_k|$ , the last line follows from Lemma 1 with  $G_1, \dots, G_m$  being independent Gumbel distributions. Note that  $E_{\mathcal{O}} = o_p(1)$  provided  $\ln(p)/n \rightarrow 0$ . Similarly, for

$E_{\mathcal{U}}$  we have

$$\begin{aligned}
E_{\mathcal{U}} &\leq 2 \sum_{m=1}^M \sum_{j \in \mathcal{U}_m} \exp \left[ \frac{1}{2} \tilde{\lambda}_{jm}(\mathbf{X}_j) - \tilde{\nu}_m \{\ln(n) + 2 \ln(p)\} \right] \\
&= 2 \sum_{m=1}^M \sum_{j \in \mathcal{U}_m} \exp \left[ -\frac{1}{2} n \{ \tilde{\Delta}_{jm} + o_p(1) \} - \tilde{\nu}_m \{\ln(n) + 2 \ln(p)\} \right] \\
&\leq 2 \sum_{m=1}^M \frac{p_{0m}}{p^{2\tilde{\nu}_m}} \exp \left[ -\frac{1}{2} n \left\{ \min_{j \in \mathcal{U}_m} \tilde{\Delta}_{jm} \right\} - \tilde{\nu}_m \ln(n) \right] + \text{smaller terms} \\
&= o_p(1)
\end{aligned}$$

where  $\tilde{\Delta}_{jm} = \Delta_{jm_j} - \Delta_{jm} > 0$ , the above  $\tilde{\nu}_m$  may be positive or negative, and  $p_{0m} = |\mathcal{U}_m|$ . The only potentially problematic term occurs for when  $m = 1$  since  $\nu_1 = 0$ . For this case  $E_{\mathcal{U}} = o_p(1)$  provided

$$p_{01} \exp \left[ -\frac{1}{2} n \left\{ \min_{j \in \mathcal{U}_1} \tilde{\Delta}_{j1} \right\} \right] = o(1).$$

Which is true provided  $\ln(p)/n \rightarrow 0$ . Hence,  $\tilde{E}_{\mathcal{O}} + E_{\mathcal{U}} = o_p(1)$ .

## B Competing Methods

Competing methods are listed in Table 1 below.

| Method                                                    | Paper                        | R Implementation                                   |
|-----------------------------------------------------------|------------------------------|----------------------------------------------------|
| DLDA/DQDA                                                 | Dudoit et al. (2002)         | <code>sparsediscrim</code> - Ramey (2017)          |
| Penalized LDA                                             | Witten and Tibshirani (2011) | <code>penalizedLDA</code> - Witten (2015)          |
| Nearest Shrunken Centroids                                | Tibshirani et al. (2003)     | <code>pamr</code> - Hastie et al. (2014)           |
| Random Forest                                             | Breiman (2001)               | <code>randomForest</code> - Liaw and Wiener (2002) |
| Support Vector Machine (SVM)                              | Cortes and Vapnik (1995)     | <code>e1071</code> - Meyer et al. (2017)           |
| Multinomial logistic regression with LASSO regularization | Tibshirani (1996)            | <code>glmnet</code> - Friedman et al. (2010)       |
| K nearest neighbours classifier ( $K=1$ )                 | Cover and Hart (1967)        | <code>class</code> - Venables and Ripley (2002)    |

Table 1: ML methods used in our comparisons

For the ML methods that required hyper-parameter tuning we detail such tuning as follows:

- Random Forest was tuned following guidelines for Microarray data from Díaz-Uriarte and Alvarez de Andrés (2006).

- Default parameters were used for SVM.
- `cv.glmnet` was used to select the best value of the regularisation parameter  $\lambda$  for multinomial logistic regression with LASSO regularisation.
- $K = 1$  was used for KNN as this produced the best prediction results.
- In Nearest Shrunken Centroids, the shrinkage parameter  $\Delta$  was tuned following procedures from Tibshirani et al. (2003) - we first trained using `pamr.train` before using `pamr.adaptthresh` to adaptively search for a set of good threshold scales to use in further retraining.
- Penalized LDA - optimal parameters  $K$  (number of discriminant vectors to be used) and  $\lambda$  (regularisation parameter) were determined running `PenalizedLDA.cv` before training (as guided by the PenalizedLDA vignette).

## R code implementation

We include general format of the R code used in this paper for complete transparency.

- Discriminant Analysis methods
  - DLDA `sparsediscrim`

```
res = dlda(mX.train, vy.train)
vals = as.numeric(predict(res, newdata = mX.test)$class)
```
  - DQDA `sparsediscrim`

```
res = dqda(mX.train, vy.train)
vals = as.numeric(predict(res, newdata = mX.test)$class)
```
  - Penalized LDA `penalizedLDA`

```
cv.out = PenalizedLDA.cv(mX.train,vy.train,type="standard",
  lambdas=c(1e-4,1e-3,1e-2,.1,1,10))
vals = PenalizedLDA(mX.train,vy.train,type="standard",
  xte=mX.test, lambda=cv.out$bestlambda,K=cv.out$bestK)
```
  - NSC `pamr`

```
mydata = list(x=t(mX.train),y=as.factor(vy.train), geneid=1:p)
```

```

res = pamr.train(mydata)
new.scales = pamr.adaptthresh(res)
res = pamr.train(mydata, threshold.scale=new.scales)
vals = as.numeric(pamr.predict(res, t(mX.test), threshold=new.scales))

```

- Random Forest `randomForest`

```

res = randomForest(mX.train, vy.train, ntree=500,
mtry=floor(sqrt(p)),nodesize=1)
vals = as.numeric(predict(res, newdata = mX.test))

```

- Support Vector Machine `e1071`

```

res = svm(mX.train, vy.train, probability=FALSE)
vals = predict(res,mX.test, decision.values=TRUE, probability=FALSE)

```

- Multinomial Response LASSO `glmnet`

```

res = cv.glmnet(mX.train,vy.train,family="multinomial")
vals = predict(cv, newx = mX.test, s = "lambda.min", type = "class")

```

- K nearest neighbours `class`

```

vals = knn(mX.train, mX.test, vy.train, k=1)

```

## Generation of covariance matrix for simulations

```

genZeroMeanSparseCovNormal = function(n,nBlocks,blockSize,perc,symmetric,
                                         permute=TRUE,seed)

```

```

{
  set.seed(seed)
  p = nBlocks*blockSize
  nnz = round(nBlocks*blockSize*perc)
  mX = c()
  lmSigma = list()
  lmZ = list()

  for (b in 1:nBlocks)

```

```

{
  randRows = sample(1:blockSize, nnz, replace = TRUE)
  randCols = sample(1:blockSize, nnz, replace = TRUE)

  if (symmetric) {
    vr = c(1:blockSize,randRows,randCols)
    vc = c(1:blockSize,randCols,randRows)
  } else {
    vr = c(1:blockSize,randRows)
    vc = c(1:blockSize,randCols)
  }

  vals = rnorm(length(vr))
  mA = sparseMatrix(x=vals, i=vr, j=vc)
  lmSigma[[b]] = t(mA)%*%mA
  mZ = t(mA%*%matrix(rnorm(n*blockSize),blockSize,n))
  mZ = matrix(mZ,n,blockSize)

  lmZ[[b]] = mZ
  mX = cbind(mX,mZ)

}

if (permute) {
  ord = sample(p)
  mX = mX[,ord]
}

return(list(mX=mX,lmSigma=lmSigma,lmZ=lmZ,ord=ord))
}

```

## C Tables

### Wilcoxin Signed Rank Test

The Wilcoxin Signed Rank Test was performed to see if the population mean ranks differed for classification performance between two competing ML methods. A one-sided test was performed to see if the mean ranks for the multiDA methods were lower than those of those competitors.  $p$ -values from these tests are reported in the tables below.

|          | multiLDA | multiQDA | DLDA      | DQDA      | penLDA    | NSC      | RF        | KNN       | SVM       | LASSO     |
|----------|----------|----------|-----------|-----------|-----------|----------|-----------|-----------|-----------|-----------|
| multiLDA | -        | 0.7264   | 3.607e-10 | 3.688e-10 | 4.165e-09 | 5.63e-10 | 6.037e-10 | 3.831e-10 | 3.747e-10 | 1.889e-06 |
| multiQDA | 0.271    | -        | 3.607e-10 | 3.504e-10 | 3.093e-09 | 5.32e-10 | 7.54e-10  | 3.832e-10 | 3.72e-10  | 1.846e-07 |

Table 2:  $p$ -values for Wilcoxin Signed Rank test for TCGA dataset

|          | multiLDA | multiQDA | DLDA      | DQDA      | penLDA    | NSC      | RF        | KNN    | SVM       | LASSO  |
|----------|----------|----------|-----------|-----------|-----------|----------|-----------|--------|-----------|--------|
| multiLDA | -        | 0.02553  | 8.64e-10  | 3.175e-10 | 7.936e-10 | 1.77e-08 | 3.114e-10 | 0.8967 | 3.397e-10 | 0.9989 |
| multiQDA | 0.9755   | -        | 7.508e-09 | 3.247e-10 | 3.162e-08 | 2.884e-5 | 3.077e-10 | 0.9963 | 5.419e-10 | 0.9998 |

Table 3:  $p$ -values for Wilcoxin Signed Rank test for SRBCT dataset

## References

- Peter J. Bickel and Elizaveta Levina. Some theory for Fisher’s linear discriminant function, ‘naïve Bayes’, and some alternatives when there are many more variables than observations. *Bernoulli*, 10(6):989–1010, 2004. doi: 10.3150/bj/1106314847.
- Leo Breiman. Random forests. *Machine Learning*, 45(1):5–32, Oct 2001.
- Corinna Cortes and Vladimir Vapnik. Support-vector networks. *Machine Learning*, 20(3):273–297, Sep 1995.
- T. Cover and P. Hart. Nearest neighbor pattern classification. *IEEE Transactions on Information Theory*, 13(1):21–27, January 1967. ISSN 0018-9448. doi: 10.1109/TIT.1967.1053964.
- Ramon Diaz-Uriarte and Sara Alvarez de Andres. Gene selection and classification of microarray data using random forest. *BMC Bioinformatics*, 7:3, Jan 2006.



- Ramón Díaz-Uriarte and Sara Alvarez de Andrés. Gene selection and classification of microarray data using random forest. *BMC Bioinformatics*, 7(1):3, Jan 2006.
- Sandrine Dudoit, Jane Fridlyand, and Terence P Speed. Comparison of discrimination methods for the classification of tumors using gene expression data. *Journal of the American Statistical Association*, 97(457):77–87, 2002.
- Jerome Friedman, Trevor Hastie, and Robert Tibshirani. Regularization paths for generalized linear models via coordinate descent. *Journal of Statistical Software*, 33(1):1–22, 2010.
- Armengol Gasull, José A. López-Salcedo, and Frederic Utzet. Maxima of Gamma random variables and other Weibull-like distributions and the Lambert W function. *TEST*, 24(4):714–733, 2015. ISSN 1863-8260. doi: 10.1007/s11749-015-0431-9.
- Henry Han and Xiao-Li Li. Multi-resolution independent component analysis for high-performance tumor classification and biomarker discovery. *BMC Bioinformatics*, 12(1):S7, 2011.
- T. Hastie, R. Tibshirani, Balasubramanian Narasimhan, and Gil Chu. *pamr: PAM: prediction analysis for microarrays*, 2014. R package version 1.55.
- Andy Liaw and Matthew Wiener. Classification and Regression by randomForest. *R News*, 2(3):18–22, 2002.
- David Meyer, Evgenia Dimitriadou, Kurt Hornik, Andreas Weingessel, and Friedrich Leisch. *e1071: Misc Functions of the Department of Statistics, Probability Theory Group (Formerly: E1071)*, TU Wien, 2017. R package version 1.6-8.
- J. T. Ormerod, M. Stewart, W. Yu, and S. E. Romanes. Bayesian hypothesis tests with diffuse priors: Can we have our cake and eat it too? 2017. URL [arxiv.org/pdf/1710.09146.pdf](https://arxiv.org/pdf/1710.09146.pdf).
- John A. Ramey. *sparsediscrim: Sparse and Regularized Discriminant Analysis*, 2017. R package version 0.2.4.
- Robert Tibshirani. Regression shrinkage and selection via the lasso. *Journal of the Royal Statistical Society. Series B (Methodological)*, 58(1):267–288, 1996. ISSN 00359246.
- Robert Tibshirani, Trevor Hastie, Balasubramanian Narasimhan, and Gilbert Chu. Class prediction by nearest shrunken centroids, with applications to dna microarrays. *Statistical Science*, 18(1):104–117, 02 2003. doi: 10.1214/ss/1056397488.
- A. W. van der Vaart. *Asymptotic statistics, volume 3 of Cambridge Series in Statistical and Probabilistic Mathematics*. Cambridge University Press, Cambridge, 1998.

W. N. Venables and B. D. Ripley. *Modern Applied Statistics with S*. Springer, New York, fourth edition, 2002. ISBN 0-387-95457-0.

Quang H. Vuong. Likelihood ratio tests for model selection and nonnested hypotheses. *Econometrica*, 57(2):307–333, 1989.

Daniela Witten. *penalizedLDA: Penalized classification using Fisher’s Linear Discriminant*, 2015. R package version 1.1.

Daniela M. Witten and Robert Tibshirani. Penalized classification using Fisher’s linear discriminant. *Journal of the Royal Statistical Society: Series B (Statistical Methodology)*, 73(5):753–772, 2011. ISSN 1467-9868. doi: 10.1111/j.1467-9868.2011.00783.x.
